# Supplementary material for: Both small heat shock protein and J-Domain protein direct defense against Areca palm velarivirus 1 (APV1) by degrading coat protein via autophagy pathway
Source: Research Square preprint supplement (doi:10.21203/rs.3.rs-5886236/v1), 2025-02-26
Supplement: Supplementary file 1 [file 7497e26e4e123f1fccb75240.docx]

## Supporting information


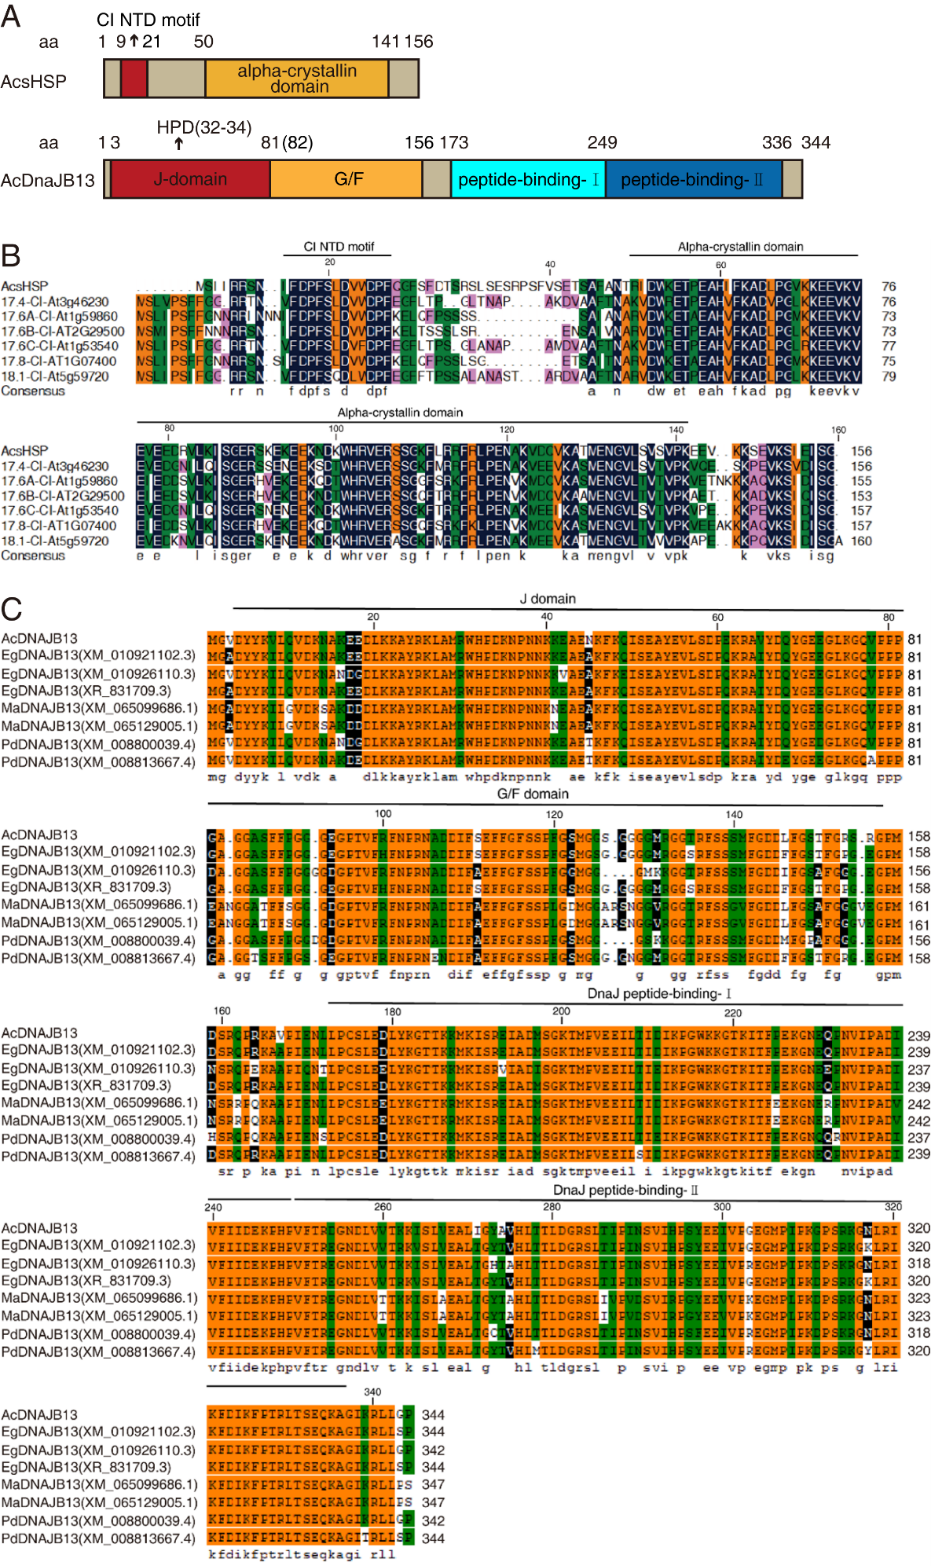


**Figure S1** (**A)** Protein structure of AcsHSP and AcDNAJB13. Location of alpha-crystallin domain and CⅠ NTD motif are indicated for AcsHSP. J-domain with HPD motif, G/F domain, peptide-binding Ⅰ and peptide-binding Ⅱ domains are indicated for AcDNAJB13. (**B)** Alignment of AcsHSP with cytosolic Ⅰ class members of Arabidopsis. (**C)** Alignment of AcDNAJB13 with other type Ⅱ J-domain proteins.


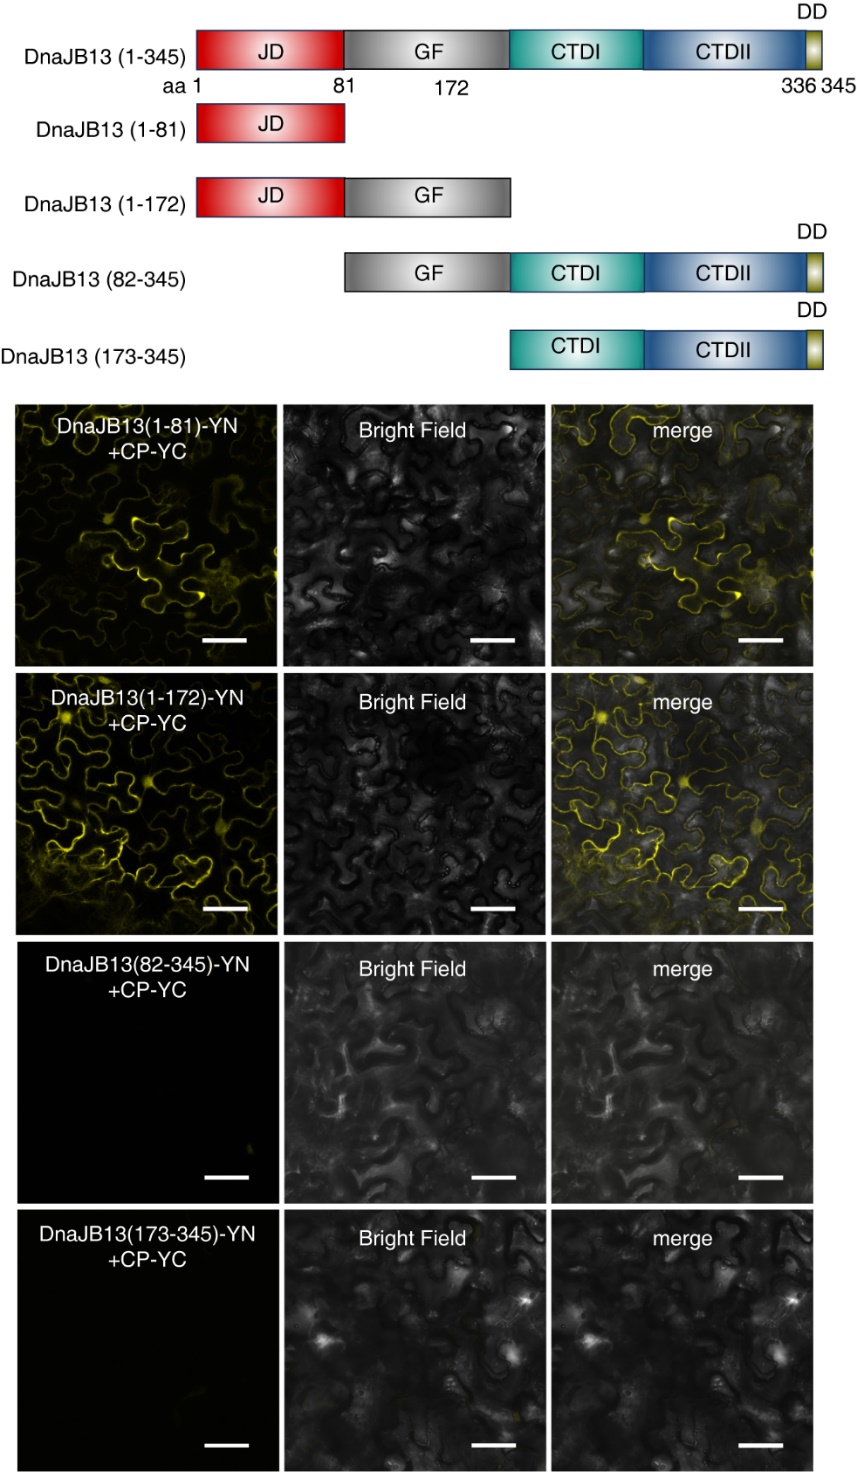


**Figure S2. Interaction between CP and truncated AcDNAJB13.** The truncated fragments and domains of AcDNAJB13 were represented in upper panel. Bimolecular fluorescence complementation (BiFC) assay demonstrates the interaction between the N-terminal fragments of YFP fused to the truncated fragments (1-81aa, 1-172aa, 82-345aa and 173-345aa) of AcDNAJB13 and CP fused with C-terminal of YFP respectively. Leaves of *N. benthamiana* was collected 72 h post-infiltration (hpi).


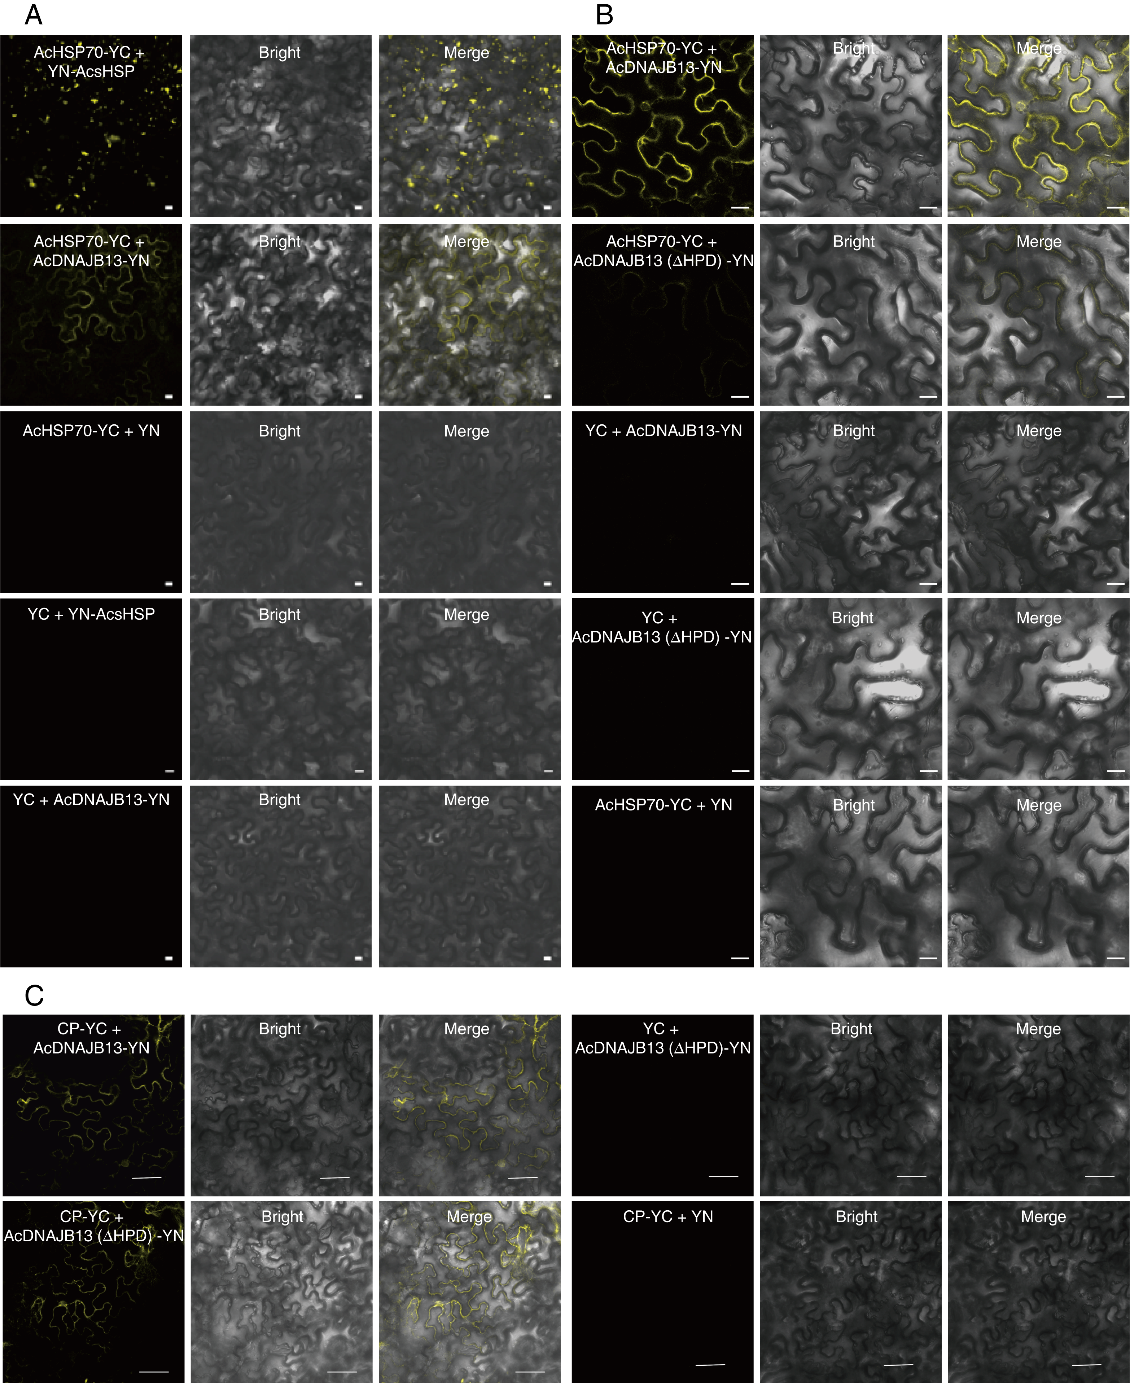


**Figure S3. Interaction between AcDNAJB13 and CP is independent on the interaction of AcDNAJB13 with AcHSP70. (A)** Bimolecular fluorescence complementation (BiFC) assay demonstrates the interaction ofAcHSP70-YCwith YN-AcsHSP and YN-AcDNAJB13, respectively. (**B)** BiFC demonstrates no interaction of AcHSP70-YC with AcDnaJB13(∆HPD)-YN. (**C)** BiFC demonstrates the interaction of CP-YC with both nYFP-AcDnaJB13 and nYFP-AcDnaJB13(∆HPD). Leaves of *N. benthamiana* was collected 72 h post-infiltration (hpi). Bars, 50 μm.


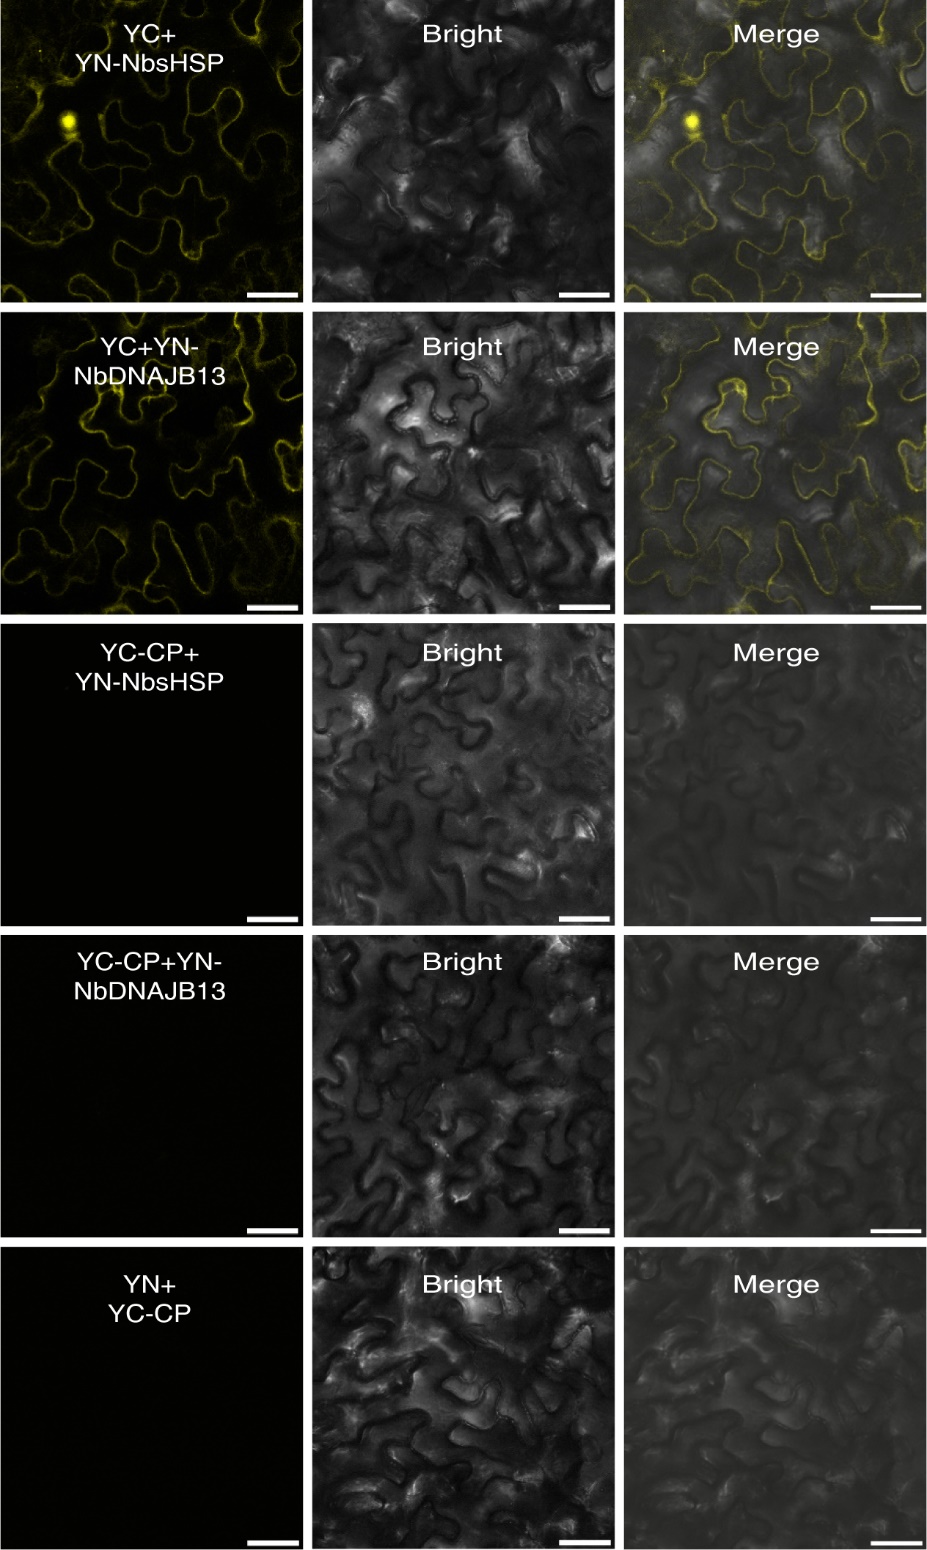


**Figure S4.** **Bimolecular fluorescence complementation (BiFC) assay demonstrating interaction between CP and NbsHSP or NbDNAJB13.** The N- or C-terminal fragments of yellow fluorescent protein (YFP) were fused to the C-terminus of NbsHSP or NbDNAJB13 and CP. The leaves of *Nicotiana benthamiana* were collected for imaging by confocal microscopy at 72 h post-infiltration (hpi). The results were reproduced in three independent experiments using three leaves in each experiment. Representative results are presented. Bars, 50 μm.


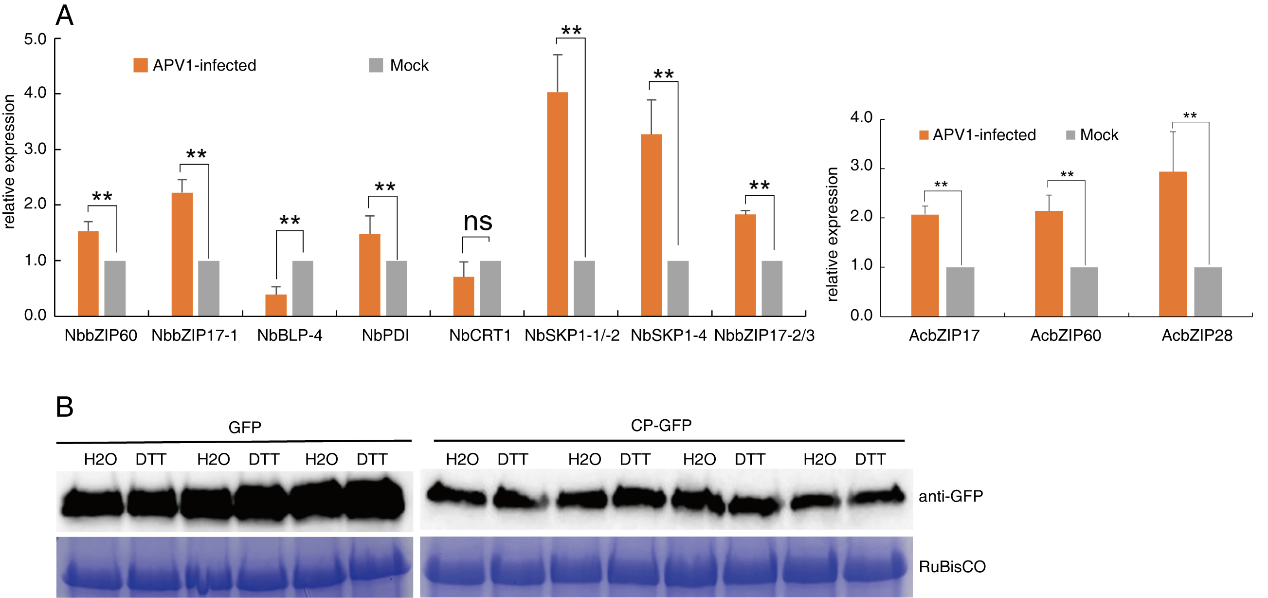


**Figure S5. APV1 infection induces host UPR**. (A-B) RT-qPCR analysis of the UPR-related genes in APV1-infected *N. benthamiana* or areca palm. *Actin* was used as an internal reference. The values represent the means of relative expression levels ± SD relative to the mock plants (n = 3 biological replicates). Asterisks denote significant differences (**P < 0.01, n.s. = not significant) between RSV-infected and mock plants. (C) Western blotting analysis of GFP or CP-GFP in *N. benthamiana* leaves treated with DTT following of transient expression of GFP or CP-GFP. Each half of a leaf was treated with DTT or ddH2O for the DTT test. The total protein was extracted at 18 hpt following by western blotting analysis. NbATG8 were detected by anti-GFP antibody. The loading controls was shown by staining Rubisco.

**
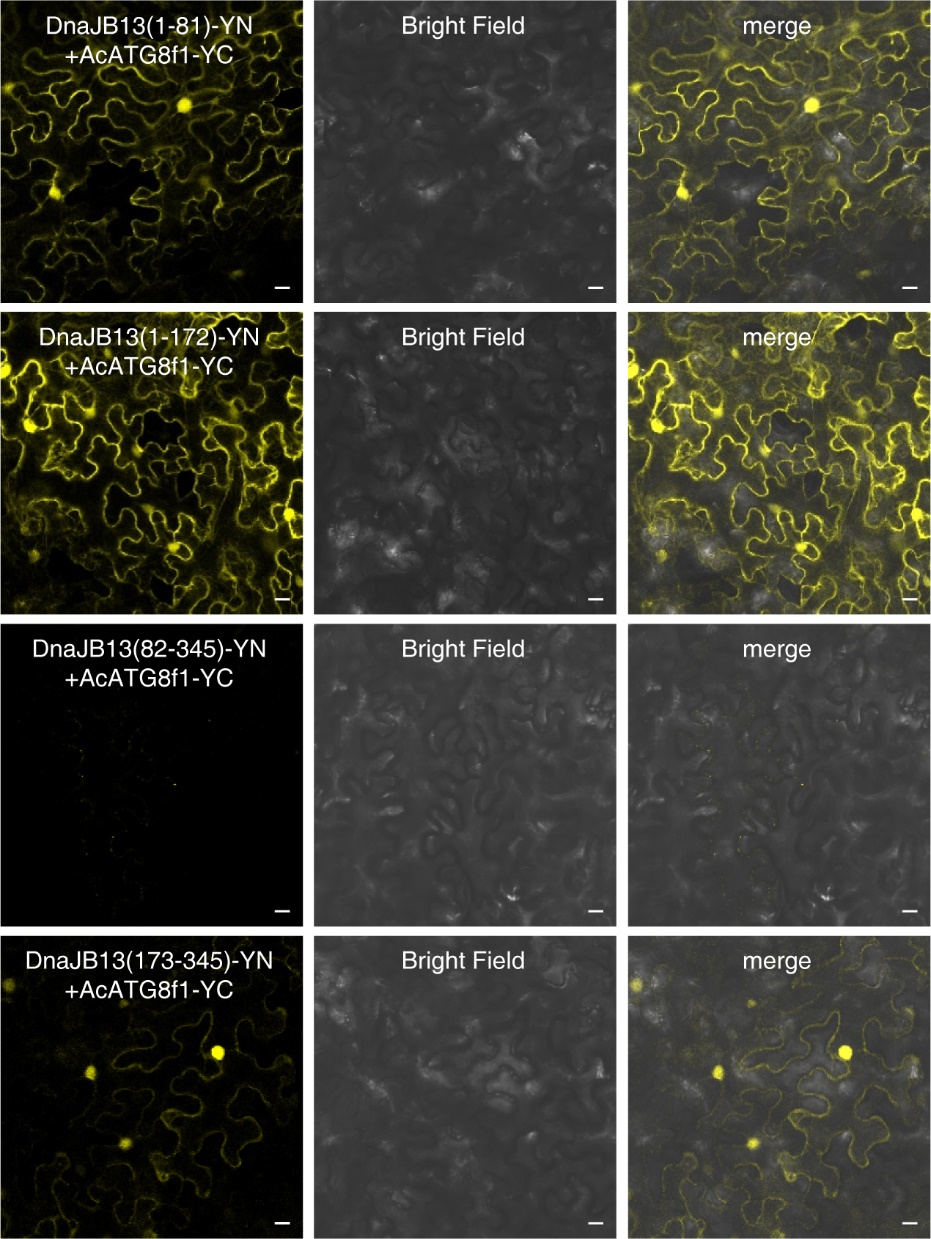
**

**Figure S6. Interaction between AcATG8f1 and truncated AcDNAJB13.** The truncated fragments and domains were represented in upper panel. Bimolecular fluorescence complementation (BiFC) assay demonstrating the interaction between the N-terminal fragments of YFP fused to the truncated fragments (1-81aa, 1-172aa, 82-345aa and 173-234aa) of AcDNAJB13 and AcATG8f1 fused with C-terminal of YFP respectively. Leaves of *N. benthamiana* was collected 72 h post-infiltration (hpi). Bars, 50 μm.


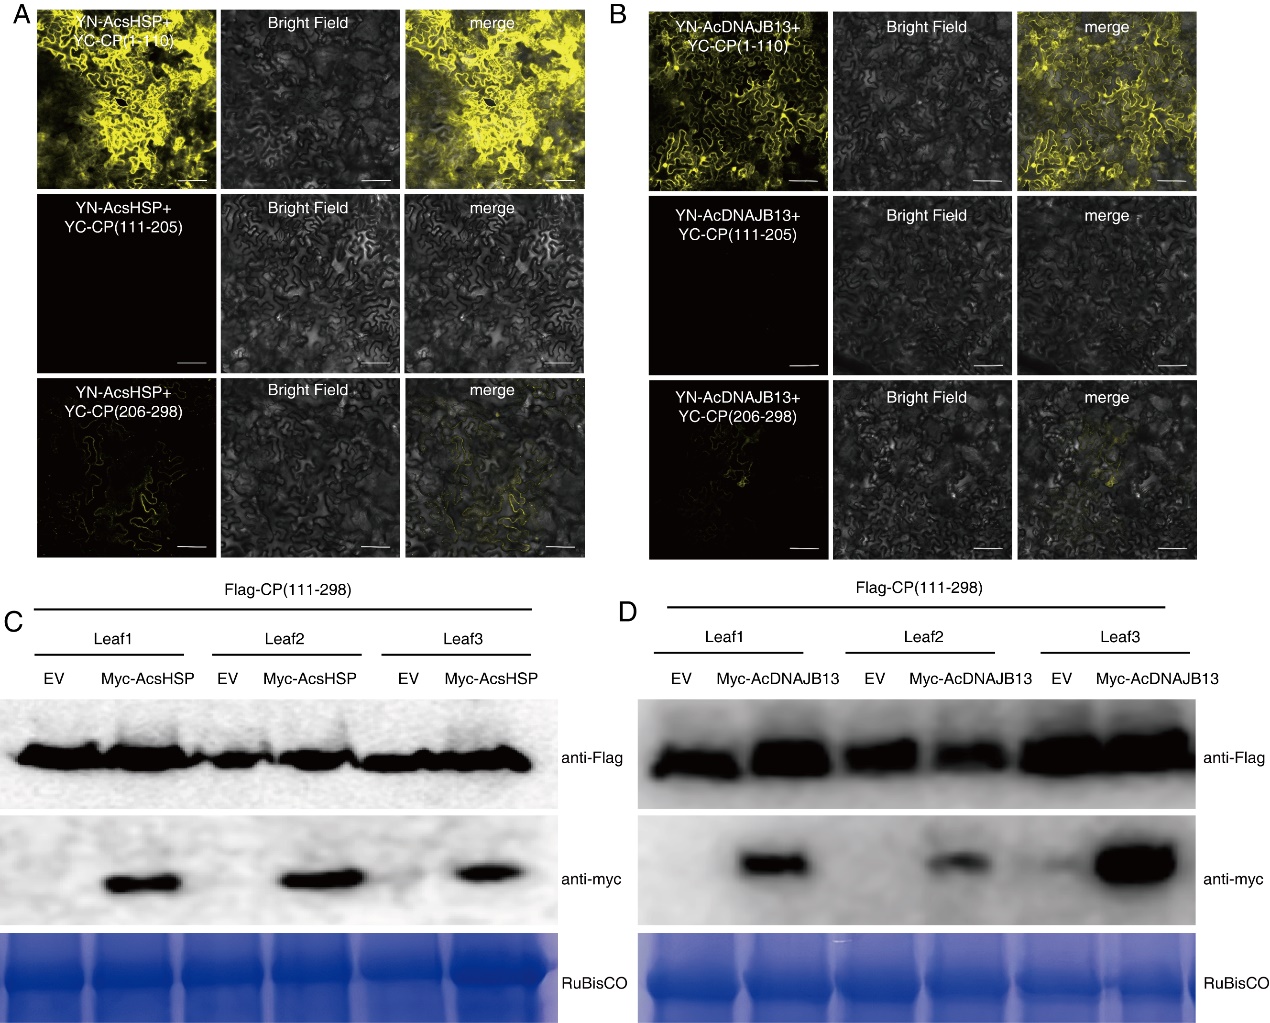


**Figure S7**. **Interactions of CP with AcsHSP and AcDNAJB13 are required for CP degradation.** (A-B) Determination of the fragments of CP interacted with AcsHSP and AcDNAJB13. Truncated fragments of CP, e.g. 1-110aa, 111-205aa and 206-298aa, were fused with c-YFP and co-expressed with nYFP-AcsHSP and nYFP-AcDNAJB13 in *N. benthamiana*, respectively. Confocal microscopy was used to image 72 h post-infiltration (hpi), bars, 50μm. (C-D) Expression of AcsHSP and AcDNAJB13 did not did not affect the stability of truncated CP. Flag-CP (111-2998aa) was co-expressed with myc-AcsHSP or myc-AcDNAJB13. The leaves were treated with 100 μM CHX and then collected for Western-blot 72h after treatment using anti-Flag (upper panel) and anti-myc (lower panel) antibodies, respectively.

**Table S1. Annotation of prey from areca palm determined by yeast two hybrid using APV1 CP as bait.**

|  | Annotation of prey | Accession Nr. |
| --- | --- | --- |
| 1 | *Phoenix dactylifera* 16.9 kDa class I heat shock protein 2-like | XM_039128788 |
| 2 | *Elaeis guineensis* DnaJ homolog subfamily B member 13 | XM_010921102 |
| 3 | *Elaeis guineensis* chromatin remodeling protein EBS | XM_010934464.3 |
| 4 | *Elaeis guineensis* ferredoxin--NADP reductase, leaf isozyme | XM_019849839 |
| 5 | *Elaeis guineensis* chlorophyll a-b binding protein 6 | XM_010908185.3 |
| 6 | *Elaeis guineensis* dormancy-associated protein 1 | XM_010945645.2 |
| 7 | *Phoenix dactylifera* probable histone H2A.2 | XM_008786436.3 |
| 8 | *Elaeis guineensis* DCC family protein At1g52590 | XM_029263078.1 |
| 9 | *Elaeis guineensis* eukaryotic translation initiation factor | XM_010935945.3 |
| 10 | *Elaeis guineensis* ATP-dependent Clp protease adapter protein CLPS1 | XM_010907787.2 |

**TABLE S2. Primers list used in this work.**

| Gene cloning | Primer Sequence (5’-3’) | Purpose |
| --- | --- | --- |
| BD-CP-F | tcagaggaggacctgcatatgatggatagacttaacttacttagaaac | cloning |
| BD-CP-R | ccgctgcaggtcgacggatccttaccgtctagtattaccaacaat |
| AD-HSP471-F | gtaccagattacgctcatatgATGTCGATCATCAGGCGGAGC | cloning |
| AD-HSP471-R | acgattcatctgcagctcgagTCAACCCGAGATCTCGATGGA |
| AD-HSP1035-F | gtaccagattacgctcatatgATGGGAGTGGACTACTATAAAGT | cloning |
| AD-HSP1035-R | cagctcgagctcgatggatccCTAAGGACCGAGCAGTCTTTTAA |
| YC-CP-F | CTCTCGAGCTTTCGCGAGCTCaTGGATAGACTTAACTTACTTAGAAAC | cloning |
| YC-CP-R | CGCCGGACGGGTACCGGATCCCCGTCTAGTATTACCAACAATTTG |
| YN-AcHSP471-F | CTCTCGAGCTTTCGCGAGCTCATGTCGATCATCAGGCGGA | cloning |
| YN-AcHSP471-R | GATGGATCTTCTAGAGGATCCACCCGAGATCTCGATGGATTTCA |
| nYFP-AcDnaJB13-F | CTCTCGAGCTTTCGCGAGCTCATGGGAGTGGACTACTATAAAGT | cloning |
| nYFP-AcDnaJB13-R | GATGGATCTTCTAGAGGATCCAGGACCGAGCAGTCTTTTAAT |
| nY-NbsHSP-F | CTCTCGAGCTTTCGCGAGCTCATGTCACTGATTCCAAGAGT | cloning |
| nY-NbsHSP-R | GATGGATCTTCTAGAGGATCCACCAGCAATCTCAATGGAT |
| nY-NbDnaJB13-F | CTCTCGAGCTTTCGCGAGCTCATGGGTGTGGACTACTACA | cloning |
| nY-NbDnaJB13-R | GATGGATCTTCTAGAGGATCCTGTTAAATATCGCTTAATG |
| nYFP-DnaJ(1-81)-F | CTCTCGAGCTTTCGCGAGCTCATGGGAGTGGACTACTATAA | cloning |
| nYFP-DnaJ(1-81)-R | ATGGATCTTCTAGAGGATCCGGGGGGCGGGACCTGCCCCTT |
| nYFP-DnaJ(1-172)-F | CTCTCGAGCTTTCGCGAGCTCATGGGAGTGGACTACTATAA | cloning |
| nYFP-DnaJ-(1-172)-R | ATGGATCTTCTAGAGGATCCCAAATTCTCGATCGGCACCGC |
| nYFP-DnaJ-(81-343)-F | CTCTCGAGCTTTCGCGAGCTCatgGGGGCTGGCGGGGCCTCCT | cloning |
| nYFP-DnaJ(81-343)-R | GATGGATCTTCTAGAGGATCCAGGACCGAGCAGTCTTTTAA |
| nYFP-DnaJ-(172-343)-F | CTCTCGAGCTTTCGCGAGCTCatgTTGCCTTGTAGCCTCGAGGA | cloning |
| nYFP-DnaJ(172-343)-R | GATGGATCTTCTAGAGGATCCAGGACCGAGCAGTCTTTTAA |
| cY-CP(1-110)-R | CGCCGGACGGGTACCGGATCCTTGACAAACGAAATCAAC | cloning |
| cY-CP(111-205)-F | CTCTCGAGCTTTCGCGAGCTCATGGCGCCGGATGAACTA |
| cY-CP(111-205)-R | CGCCGGACGGGTACCGGATCCTGCCTTAAGTGCATTGACC | cloning |
| cY-CP(206-298)-F | CTCTCGAGCTTTCGCGAGCTCatgATTCCCAACGTGTTGC |
| cLuc-AcsHSP-F | TCCCGGGGCGGTACCcgggatccaATGTCGATCATCAGGC | cloning |
| cLuc-AcsHSP-R | ACGAAAGCTCTGCAGGTCGACTCAACCCGAGATCTCGAT |
| cLuc-AcDNAJB13-F | CCGGGGCGGTACCcgggatccaATGGGAGTGGACTACTA | cloning |
| cLuc-AcDNAJB13-R | acgaACGAAAGCTCTGCAGGTCGACCTAAGGACCGAGCAG |
| nLuc-AcATG8f1-F | GCTCGGTACCcgggatccATGGCGAAGAGTTCCTTCAA | cloning |
| nLuc-AcATG8f1-R | cgtacgagatctggtcgacGGAGGACCCAAATGTGTTCT |
| pET30a-AcsHSP-F | GTGGTGGTGGTGGTGCTCGAGACCCGAGATCTCGATGGA | cloning |
| pET30a-AcsHSP-R | GCTGATATCGGATCCGAATTCATGTCGATCATCAGGCGG |
| pET-30a-AcDNAJB13-F | GTGGTGGTGGTGGTGCTCGAGAGGACCGAGCAGTCTTTTA | cloning |
| pET-30a-AcDNAJB13-R | GCTGATATCGGATCCGAATTCATGGGAGTGGACTACTATAAAG |
| GST-CP-F | TGGGATCCCCGGAATTCCCGatggatagacttaacttacttagaaac | cloning |
| GST-CP-R | ATGCGGCCGCTCGAGTCGACCttaccgtctagtattaccaacaat |
| Y-FLAG-ORF6-(111-298)-F | AGAACACGGGGGACGAGCTCATGGCGCCGGATGAACTAT | cloning |
| Y-FLAG-ORF6-(111-298)-R | TCGTCGACTCTAGAGGATCCCCGTCTAGTATTACCAACAA |
| 1302-MYC-F | ACGGGGGACTCTTGACCATGGAGCAGAAACTCATCTCTGAAGAGGATCTGTGA | cloning |
| 1302-MYC-R | GGGAAATTCGAGCTGGTCACCTCACAGATCCTCTTCAGAGATGAGTTTCTGCTC |
| 1302-CP-GFP-F | CACGGGGGACTCTTGACCATGGATAGACTTAACTTACTTA | cloning |
| 1302-CP-GFP-R | AGTCAGATCTACcatggtCCGTCTAGTATTACCAACAATT |
| 1302-Myc-AcDNAJB13-F | GGACTCTTGACCATGGAGCAGAAACTCATCTCTGAAGAGGATCTGGGAGTGGACTACTATAAAGTCC | cloning |
| 1302-Myc-AcDNAJB13-R | GGGAAATTCGAGCTGGTCACCCTAAGGACCGAGCAGTCTTTTA |
| 1302-Myc-AcsHSP-F | GGACTCTTGACCATGGAGCAGAAACTCATCTCTGAAGAGGATCTGTCGATCATCAGGCG | cloning |
| 1302-Myc-AcsHSP-R | GGGGAAATTCGAGCTGGTCACCTCAACCCGAGATCTCGATG |
| AcATG8f1-RFP-1F | GAGAACACGGGGGACGAGCTCATGGCGAAGAGTTCCTTCA | cloning |
| AcATG8f1-RFP-1R | CATGTCGACTCTAGAGGATCCGGAGGACCCAAATGTGTTCT |
| NbATG8f1-RFP-F | GAGAACACGGGGGACGAGCTCATGGCTAAGAGCTCATTCAA | cloning |
| NbATG8f1-RFP-R | CATGTCGACTCTAGAGGATCCCAGCTTGTTCAGGTCCCC |
| TRV-NbATG3A1(BanHI)-F | agaaggcctccatggggatccAAGCAGAACTTCACCTCCAG | cloning |
| TRV-NbATG3A1(XhoI)-R | gggacatgcccgggcctcgagATGGTACTGTCGCAGAAGA |
| TRV-NbATG5(BanHI)-F | agaaggcctccatggggatccACGTTCAGGTTCTGCACAAA | cloning |
| TRV-NbATG5(XhoI)-R | gggacatgcccgggcctcgagATGGGAAGTAAAGGGGCAG |
| TRV-NbATG7A(BanHI)-F | agaaggcctccatggggatccCAACGTGTTTGTATTGAG | cloning |
| TRV-NbATG7A(XhoI)-R | gggacatgcccgggcctcgagATGGCGGATAGTGGAAGAG |
| TRV-NbATG8f1(BanHI)-F | agaaggcctccatggggatccCTTCTTTTCGTCATAGAT | cloning |
| TRV-NbATG8f1(XhoI)-R | gggacatgcccgggcctcgagATGGCTAAGAGCTCATTCA |
| TRV-NbBeclin1(BanHI)-F | agaaggcctccatggggatccTCCTCGTCCTCGAGACTGAA | cloning |
| TRV-NbBeclin1(XhoI)-R | gggacatgcccgggcctcgagATGATGAAAAATAGCAGCA |
| TRV-GFP(BanHI)-F | agaaggcctccatggggatccCTTGAAGAAGATGGTCCTC | cloning |
| TRV-GFP(XhoI)-R | gggacatgcccgggcctcgagAGTAAAGGAGAAGAACTT |
| TRV-GUS(BanHI)-F | agaaggcctccatggggatccCACTTTGCCGTAATGAGTG | cloning |
| TRV-GUS(XhoI)-R | gggacatgcccgggcctcgagAACCGACGACTCGTCCGTC |
| TRV-NbDnaJB13-BamHI-F | agaaggcctccatggggatccCCGGAACGACCCATGACC | cloning |
| TRV-NbDnaJB13-XhoI-R | ggacatgcccgggcctcgagATGGGTGTGGACTACTACAA |
| TRV-NbsHSP-BamHI-F | agaaggcctccatggggatccACACGGTGCCAAGTATCAT | cloning |
| TRV-NbsHSP-XhoI-R | gggacatgcccgggcctcgagACCTCTGCATTCGCTAACA |
| NbActin-qRT-F | AAGACCAGCTCATCCGTGGA | RT-qPCR |
| NbActin-qRT-R | CTCATCCTATCAGCAATGCCC |
| NbDnaJB13-qPCR-F | GATGAGAAGCCGCATAGTG | RT-qPCR |
| NbDnaJB13-qPCR-R | AGCGTTGTTATTTGAGCAGTA |
| NbsHSP-qPCR-F | ACACGGTGCCAAGTATCAT | RT-qPCR |
| NbsHSP-qPCR-R | CGCTAATCTGAAGAACCCTA |
| AcDnaJB13-qPCR-F | TGTTCGGGGATGACTTGT | RT-qPCR |
| AcDnaJB13-qPCR-R | CTTCTTCGTGGTGCCTTT |
| AcsHSP-qPCR-F | AGAGGAGCAGCGGCAAAT | RT-qPCR |
| AcsHSP-qPCR-R | CGCTCACCGACAGAACCC |
| Acactin-F | CCCCAGAAGAACACCCA | RT-qPCR |
| Acactin-R | AATAGCCACATACATAGCAG |
| AcbZIP17qRT-PCR-F | GGACAATCCAAAGGTAGAA | RT-qPCR |
| AcbZIP17qRT-PCR-R | AAAGCAATGCAGGAAGAGT |
| AcbZIP28qRT-PCR-F | AGAGCAGGGTCAAGAAAGT | RT-qPCR |
| AcbZIP28qRT-PCR-R | ACCTAATCCACCAAATACA |
| AcbZIP60qRT-PCR-F | TCTTGGCAGGGTTCTTTTC | RT-qPCR |
| AcbZIP60qRT-PCR-R | TTCTCCTTCGGCTCACTTT |
| NbbZIP60_qRT-F | ATTGACTCTAAGGACGGCTCT | RT-qPCR |
| NbbZIP60_qRT-R | ATACAACTTCTTCCGCTCTCG |
| NbbZIP17-1_qRT-F | TGGCTTGTTGTTCTTCATGCTC | RT-qPCR |
| NbbZIP17-1_qRT-R | AAAATTCTTCCGCGATGCCTT |
| NbBLP-4_qRT-F | TCGTTTTCGCAATCGTCCT | RT-qPCR |
| NbBLP-4_qRT-R | ATGTCCGTTCTTGTAGACACC |
| NbPDI_qRT-F | TTATTGCCAATCTTGACGCTGA | RT-qPCR |
| NbPDI_qRT-R | TTGCCCTTTCGAATCACGGCTA |
| NbCRT1_qRT-F | GGCTCCTTTGATTGACAACCC | RT-qPCR |
| NbCRT1_qRT-R | TGGCATACTCTGGATCATCGC |
| NbSKP1-1/-2_qRT-F | CTAGAGTCGCAGACAATCAAGCA | RT-qPCR |
| NbSKP1-1/-2_qRT-R | CGCTTGCAGTACTCAATCACC |
| NbSKP1-4_qRT-F | GTCCGCTTTGTTTCTCTCGTT | RT-qPCR |
| NbSKP1-4_qRT-R | CGTCGGAACTCTTCAACACA |
| NbbZIP17-2/-3_qRT-F | GCCTGCACCAAAGAGTAGCAA | RT-qPCR |
| NbbZIP17-2/-3_qRT-R | CCACTCATAAACGGTTCCCTC |
| NbATG3_qRT2-F | ATAATCTCGTCTCCAAATGCCCTA | RT-qPCR |
| NbATG3_qRT2-R | TGTCAGCAGGTAAATATGACTTCC |
| NbATG5_qRT2-F | GGCAGCATACATAATCAATGGGAA | RT-qPCR |
| NbATG5_qRT2-R | AATCATCCACTAATAGGCCAAG |
| NbATG7_qRT2-F | TCTTGTGATGGCTATTCCGAT | RT-qPCR |
| NbATG7_qRT2-R | CGACTTTCCCGTGTATCAGT |
| NbATG8c_qRT-F | CACCCACTTGAAAGGCGACAGGC | RT-qPCR |
| NbATG8c_qRT-R | GCCTTCTCAGCACTAAGCTTTATTCTC |
| NbTOR_qRT-F | ACAGCAGCTCTTCAACCAG | RT-qPCR |
| NbTOR_qRT-R | AGTCTGAGATATACACGAGCAAC |
| NbATG8d_qRT-F | AGTTAATACTTGTTCCTGCTGATCTGG | RT-qPCR |
| NbATG8d_qRT-R | ATTGCAGACGAATTCGCCAGAGTC |
| NbATG8h_qRT-F | TTCAGACGATGAGAGACTCGCAGAATC | RT-qPCR |
| NbATG8h_qRT-R | TTCCCAGGAGCCAGATGGAGTC |
| NbBECN1_Qpcr-F | AACCGTTGTGTCTTGAATGC | RT-qPCR |
| NbBECN1_Qpcr-R | TGCTTCAAGTTTCCGCTCT |
| qPCR-ATG8f1-F | GAATCAAATTGAGTGCAGAA | RT-qPCR |
| qPCR-ATG8f1-R | AAGTAACATAAAGGAAACCATC |
| AcATG8c-qRT-1F | ACTTAGTCCCAGCAGATTT | RT-qPCR |
| AcATG8c-qRT-1R | TTTGTTTTCCTCATAGATTG |
| AcATG8c-qRT-2F | ATGGCGAGGAGTTCTTTTA | RT-qPCR |
| AcATG8c-qRT-2R | CAGCTTTCTCAACAATCACAG |
| AcATG8f-qRT-1F | GCCTATGTTATTCGCAAGA | RT-qPCR |
| AcATG8f-qRT-1R | ATTCTGAACCCCAAAAGTG |
| AcATG3A1-qRT-1F | CTTGTCTAAGGAGGGCTGTT | RT-qPCR |
| AcATG3A1-qRT-1R | TGAAGGGATGGACCGAATG |
| AcATG3B1-qRT-1F | AGCGTTTCTGAGTTCGTCC | RT-qPCR |
| AcATG3B1-qRT-1R | ATGAGATACTGCTTGTCGG |
| AcATG5A-qRT-1F | AGGGTTGCGGATTGGGTAT | RT-qPCR |
| AcATG5A-qRT-1R | CCACGGCCTTTCTGGTTCT |
| AcATG7A-qRT-1F | AAGGGCAGCGGTTAGGGTG | RT-qPCR |
| AcATG7A-qRT-1R | CGCAAGTCCAGGTCGTGTC |
